# Supplementary material for: On-chip time resolved detection of quantum dot emission using integrated superconducting single photon detectors
Source: PubMed Central journal article supplement — Sci Rep. 2013 May 28;3:1901. doi: 10.1038/srep01901 (PMC3664895; doi:10.1038/srep01901), 2013-05-28
Supplement: srep01901-s1.pdf [file srep01901-s1.pdf]

Supplementary Information

**“On-chip time resolved detection of quantum dot emission using integrated superconducting single photon detectors”**

G. Reithmaier<sup>†</sup>, S. Lichtmannecker<sup>†</sup>, T. Reichert<sup>†</sup>, P. Hasch<sup>†</sup>, K. Müller<sup>†</sup>, M. Bichler<sup>†</sup>, R. Gross<sup>‡</sup> and J. J. Finley<sup>†</sup>

<sup>†</sup>Walter Schottky Institut, Physik Department and Center of Nanotechnology and Nanomaterials, Technische Universität München, 85748 Garching, Germany

<sup>‡</sup>Walther-Meißner-Institut, Bayerische Akademie der Wissenschaften and Physik-Department, Technische Universität München, 85748 Garching, Germany

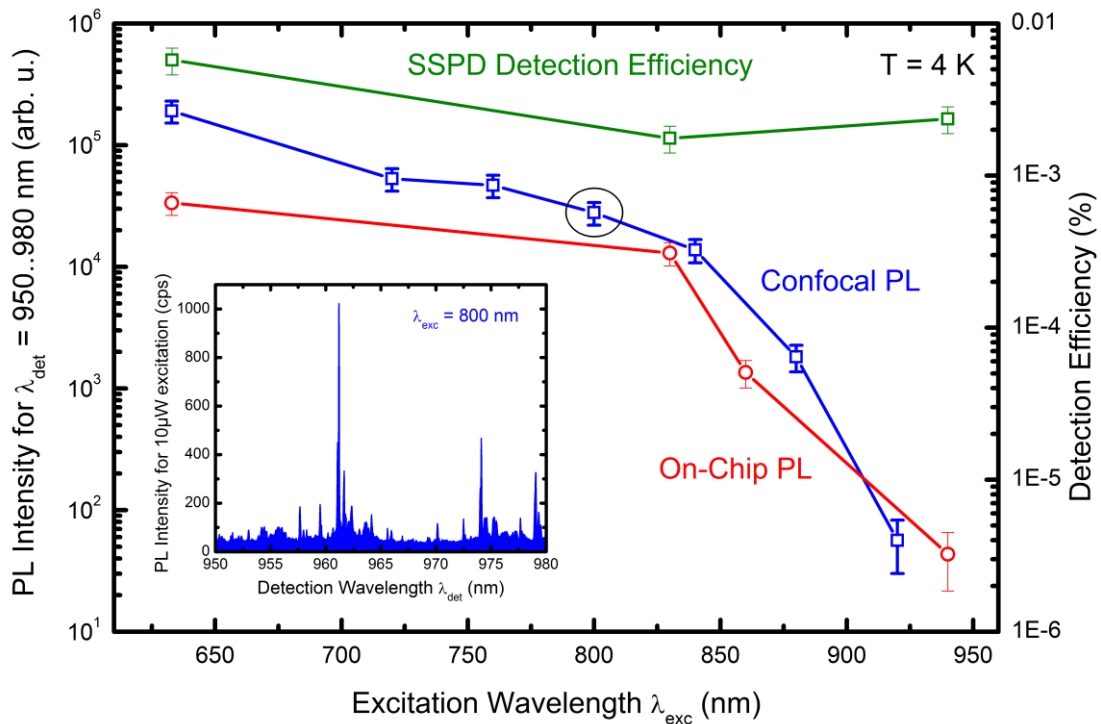

Figure S1: Comparison of the integrated on-chip (red curve) and confocal (blue curve) PL emission intensities and the measured SSPD detection efficiency

Figure S1 shows a comparison of the integrated on-chip (red curve) and confocal (blue curve) PL emission intensities and the measured SSPD detection efficiency. The data plotted on the figure was obtained using the methods described below:

- **Confocal PL:** Spectra were recorded at 16 different positions along the axis of the waveguide for each excitation wavelength. The integrated intensity over the wavelength interval from 950 - 980 nm was then plotted as a function of the excitation wavelength, representative of the photoluminescence yield from the optically pumped quantum dots within the laser focal volume. The inset shows a typical spectrum for an excitation wavelength of 800 nm.
- **On-Chip PL:** The maximum count rate with the background subtracted for the data presented in figure 2b is plotted as a function of the

excitation wavelength. Compared to the data presented in figure 2b an additional datapoint at 860 nm was recorded.

- The **top-illumination detection efficiency** of a similar SSPD having the same geometry is plotted on the rightmost y-axis. The detection efficiency was determined using the method reported in Reithmaier et al, arXiv:1212.2038 (2012).
- A ~ 3 - 4 orders of magnitude reduction of the integrated PL intensity is observed in both **confocal** (blue curve) and **on-chip** (red curve) detection geometries as the excitation wavelength is tuned > 814 nm, close to the GaAs bandgap (blue and red curve). In contrast, the **SSPD detection efficiency** reduces only weakly (~ 2.5 x) for wavelengths up to 940nm (green curve). Since the propagation losses of the multimode waveguide are very insensitive to wavelength, these observations unambiguously prove that the on-chip detected events arise from quantum dot emission, a conclusion that is further supported by the time resolved measurements presented in figure 3.

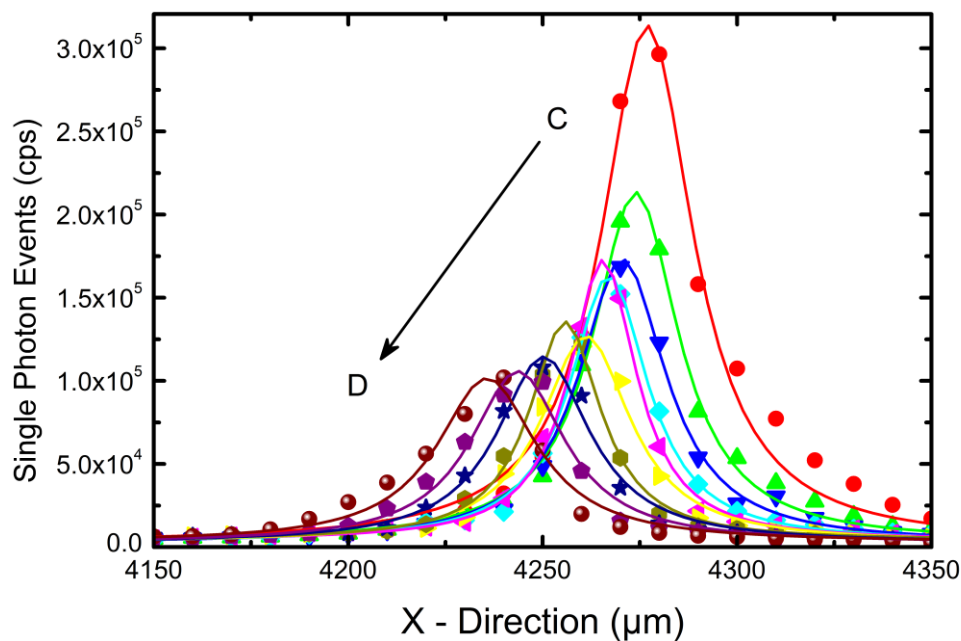

Figure S2: Estimation of the propagation losses along the waveguide bend for the path at the center of the waveguide from C to D (trajectory shown in figure 2a).

Figure S2 shows the detected single photon events as the laser spot is scanned along the x-direction in slices at different positions along the waveguide bend (C to D in figure 2a). Gaussian peak profiles were fitted to each of the curve, to obtain the amplitudes plotted in Figure S3 along the trajectory C-D.

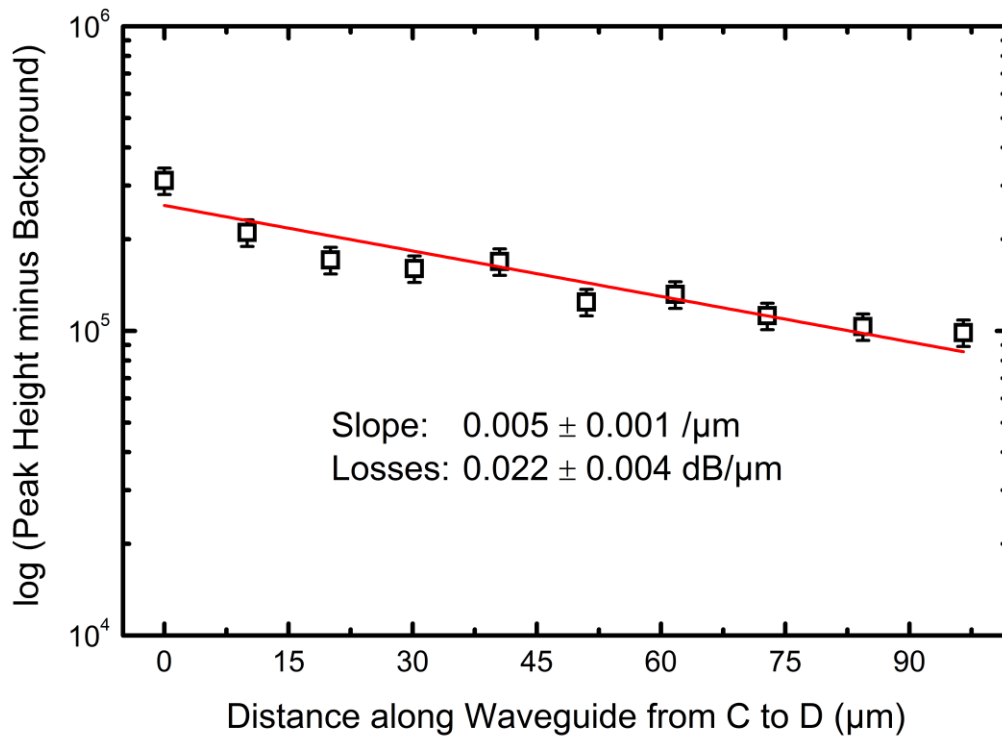

Figure S3: Amplitude of the detected light intensity, as shown in figure S2, plotted as a function of the distance along the waveguide bend.

The amplitude determined along the trajectory C-D shown in figure 2a is plotted on a semi-log scale in figure S3. A single exponential decay is found to represent the amplitude variation, from which we measure the losses along the waeguide bend to be  $0.022 \pm 0.004$  dB/ $\mu\text{m}$ . A similar analysis was performed along the directory D-E in figure 2a, revealing losses of  $0.0048 \pm 0.0004$  dB/ $\mu\text{m}$ .
